# Supplementary material
Source: Springer Nature journal article supplement (https://www.springermedizin.de/resource/supplementary/12986_2010_292_MOESM1_ESM.pdf/25655774)

MDA and conjugated diene levels ( $\mu\text{M/g}$  liver protein)

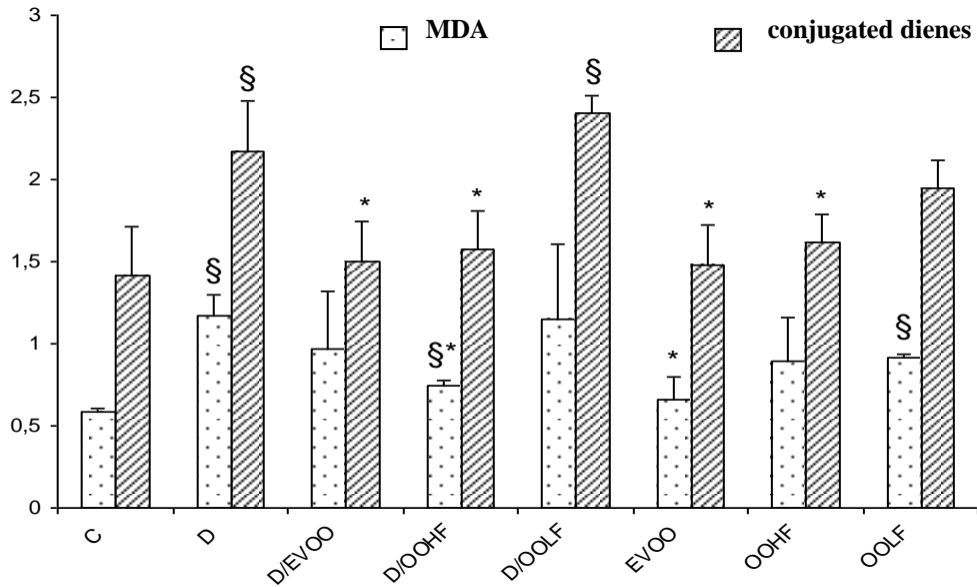

Supplement: MOESM1 [file 25655774]
